# Supplementary material for: Catalpol protects synaptic proteins from beta-amyloid induced neuron injury and improves cognitive functions in aged rats
Source: PubMed Central journal article supplement (PMC5642480; doi:10.18632/oncotarget.17951), 2017-05-17
Supplement: oncotarget-08-69303-s001.pdf [file oncotarget-08-69303-s001.pdf]

## Catalpol protects synaptic proteins from beta-amyloid induced neuron injury and improves cognitive functions in aged rats

### SUPPLEMENTARY MATERIALS

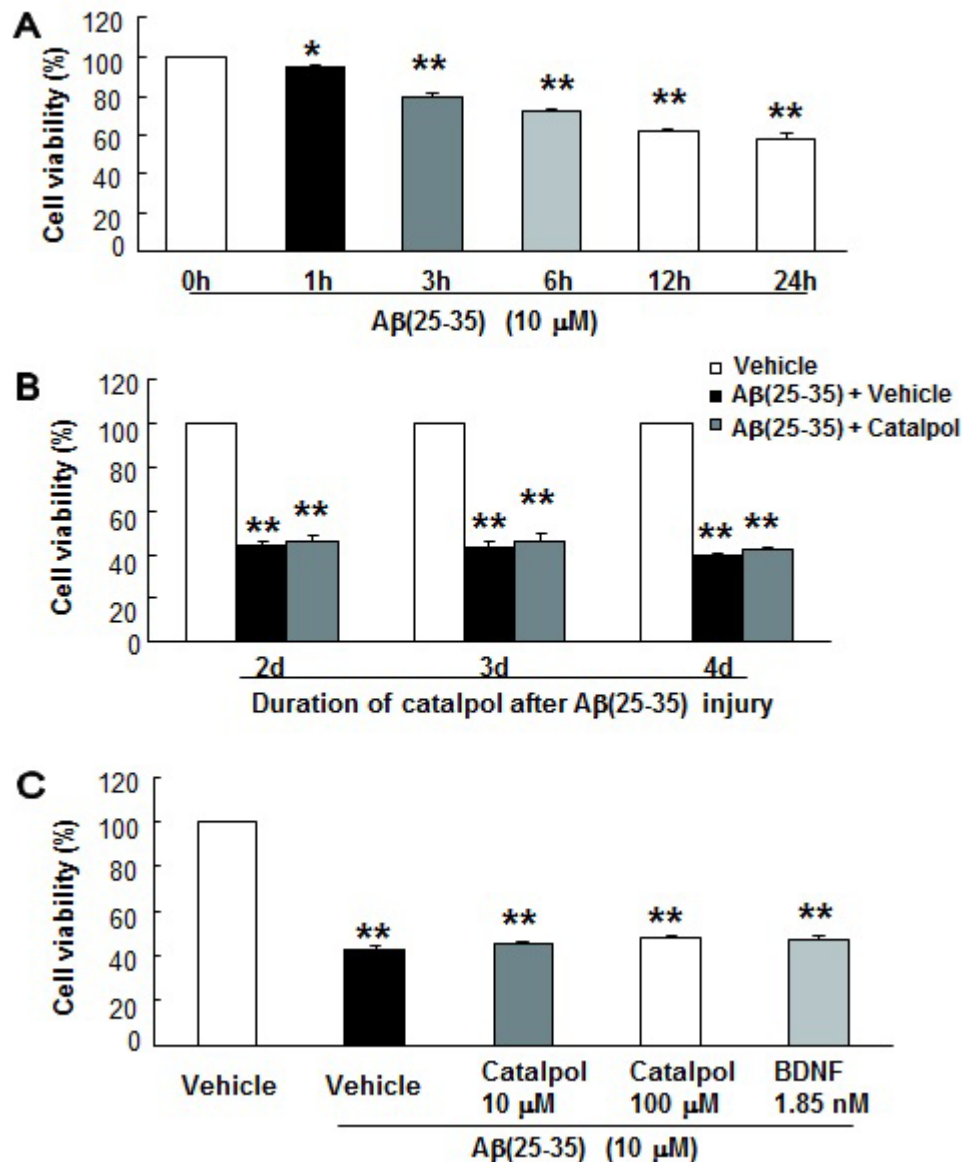

**Supplementary Figure 1: Effects of catalpol (10 μM) on cell survival of the primary cortical neurons injured by Aβ.** (A) Effects of Aβ<sub>25-35</sub> on the viability of primary cortical neurons after different exposure durations. (B) The effects of catalpol on the viability of Aβ<sub>25-35</sub>-treated neurons after different duration. (C) The effects of catalpol on the viability of Aβ<sub>25-35</sub>-treated cortical neurons at different doses. All values are normalized to the control group values and expressed as the mean ± SEM of 4 independent experiments. \* and \*\* indicate p<0.05 and p<0.01, respectively, compared with the corresponding control group.

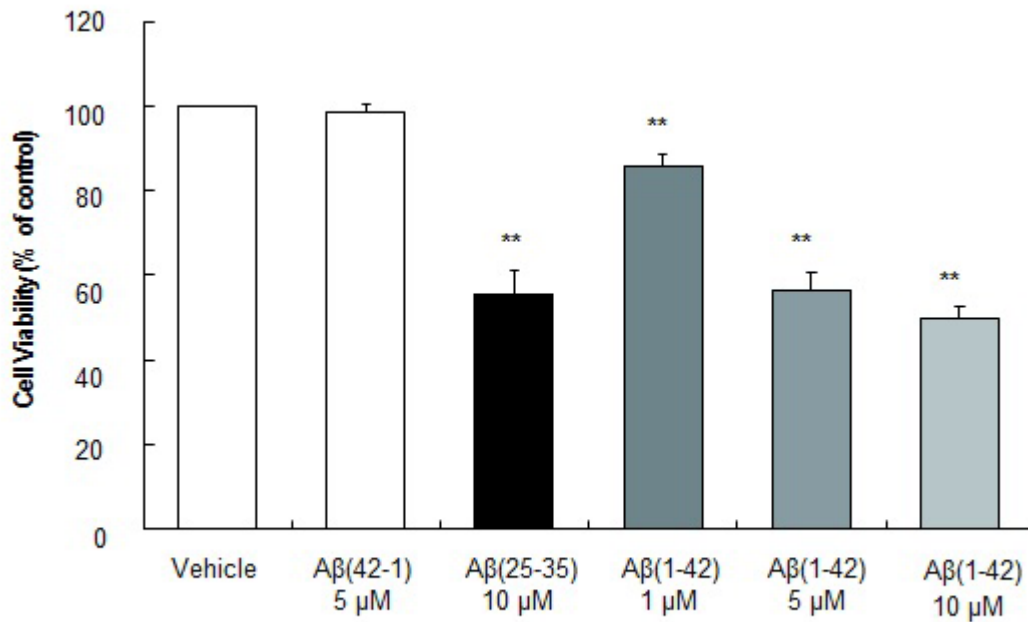

**Supplementary Figure 2: Effects of Aβ<sub>1-42</sub> on the viability of primary cortical neurons after different exposure durations.** Aβ<sub>42-1</sub>, Aβ<sub>25-35</sub> and Aβ<sub>1-42</sub> were added respectively for 12 h followed by MTT assay. The results are normalized to the control group and expressed as the mean ± SEM of 4 independent experiments. \* and \*\* indicate p<0.05 and p<0.01, respectively, compared with the corresponding control group.
